# Supplementary material for: Facile synthesis and characterization of a SnO2-modified LiNi0.5Mn1.5O4 high-voltage cathode material with superior electrochemical performance for lithium ion batteries
Source: Royal Society of Chemistry journal article supplement (doi:10.1039/c7cp00943g), 2017-01-01
Supplement: c7cp00943g1.pdf [file c7cp00943g1.pdf]

Supporting Information for

**Facile synthesis and characterization of a SnO<sub>2</sub>-modified  
LiNi<sub>0.5</sub>Mn<sub>1.5</sub>O<sub>4</sub> high-voltage cathode material with superior  
electrochemical performance for lithium ion batteries**

Feng Ma, Fushan Geng, Anbao Yuan\* and Jiaqiang Xu

Department of Chemistry, College of Sciences, Shanghai University, Shanghai  
200444, P.R. China

\*Corresponding author.

E-mail address: abyuan@shu.edu.cn (A. Yuan); Tel: +86 21 66138003

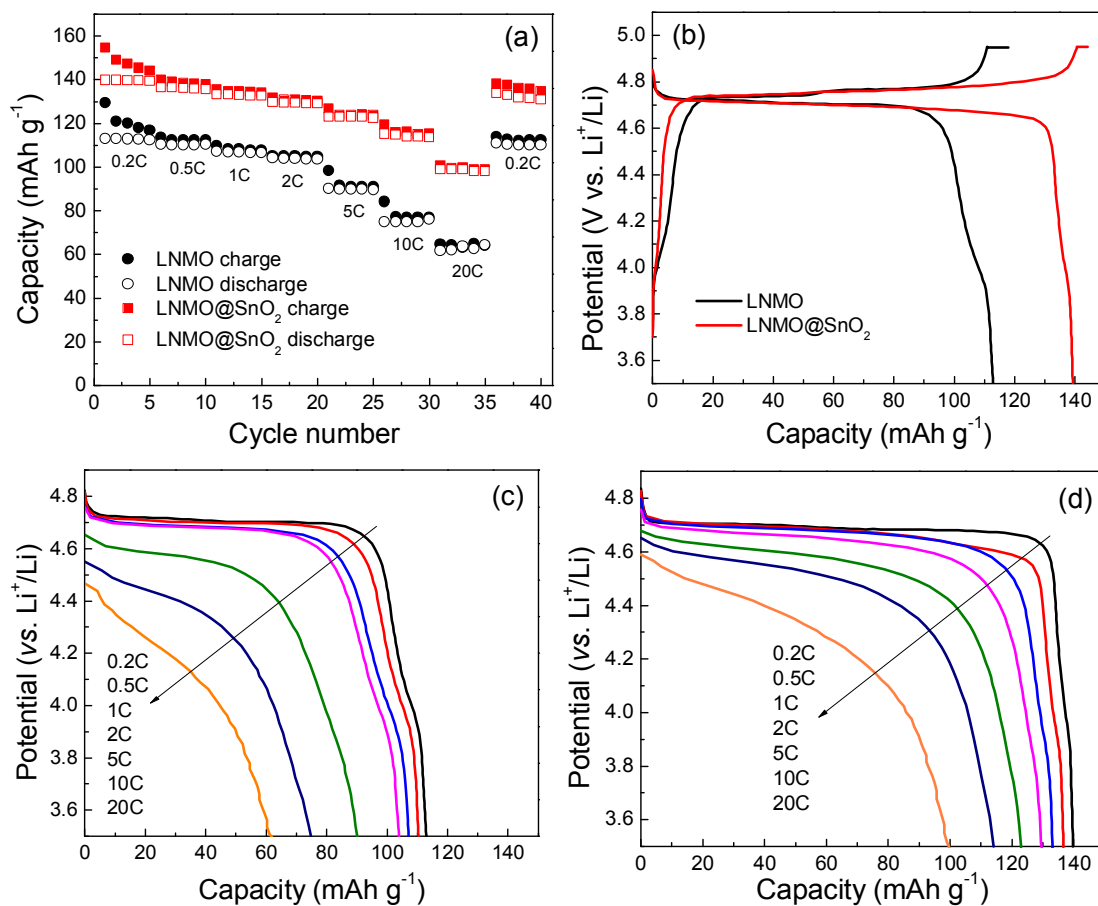

**Fig. S1** (a) Rate performances and (b) charge/discharge curves at 0.2C rate of LNMO and LNMO@SnO<sub>2</sub>. Typical discharge profiles of (c) LNMO and (d) LNMO@SnO<sub>2</sub> at different C-rates. The electrode active material mass loading is of *ca.* 4 mg cm<sup>-2</sup>.

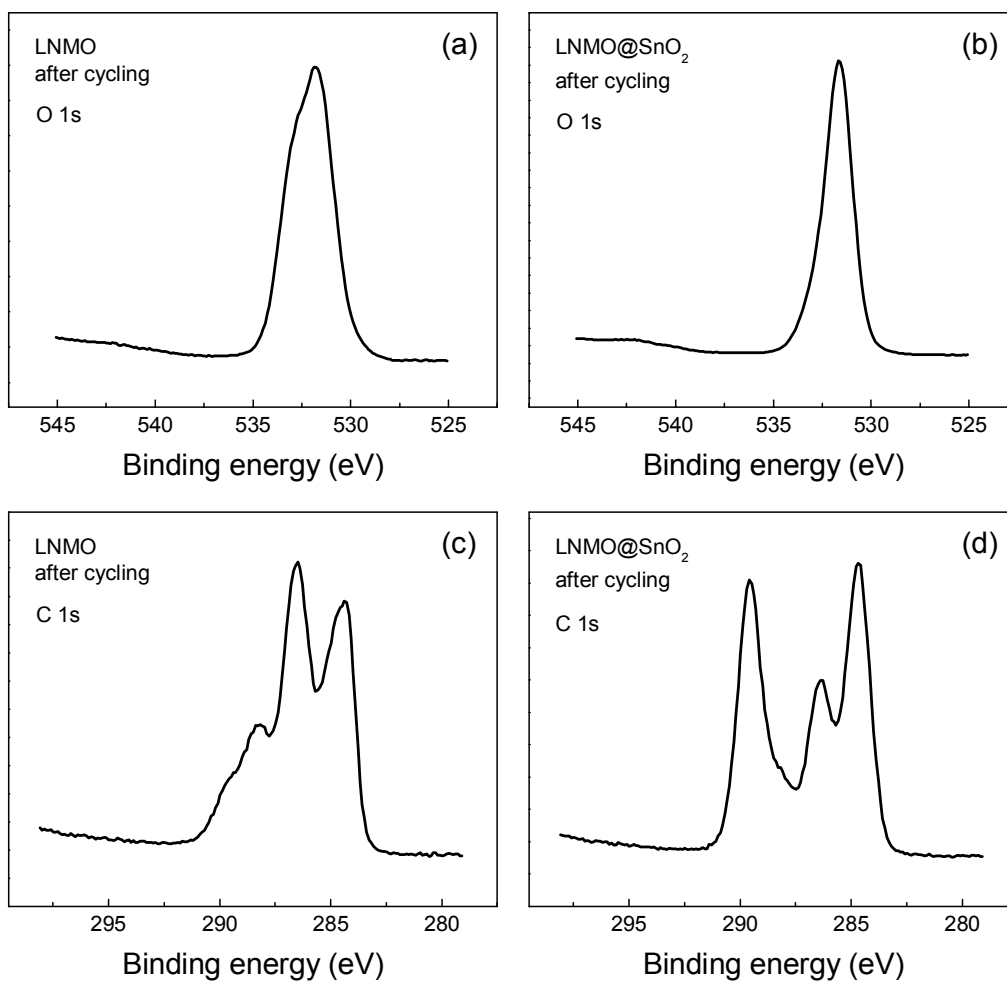

**Fig. S2** O 1s XPS spectra of (a) LNMO and (b) LNMO@SnO<sub>2</sub> electrodes, and C 1s XPS spectra of (c) LNMO and (d) LNMO@SnO<sub>2</sub> electrodes, after cycling at 2C rate for 10 cycles (at discharged state).
